# Supplementary material for: NAMPT and NAPRT1: novel polymorphisms and distribution of variants between normal tissues and tumor samples
Source: PubMed Central journal article supplement (PMC4158320; doi:10.1038/srep06311), 2014-09-09
Supplement: srep06311-s1.pdf [file srep06311-s1.pdf]

***NAMPT* and *NAPRT1*: novel polymorphisms and distribution of variants between normal tissues and tumor samples.**

Sara Duarte-Pereira<sup>a</sup>, Sarah S. Silva<sup>a</sup>, Luísa Azevedo<sup>a,b</sup>, Luísa Castro<sup>c</sup>, António Amorim<sup>a,b</sup> and Raquel M. Silva<sup>a\*</sup>

<sup>a</sup>IPATIMUP - Institute of Molecular Pathology and Immunology of the University of Porto, Rua Dr. Roberto Frias s/n, 4200-465 Porto, Portugal;

<sup>b</sup>Faculty of Sciences, University of Porto, Rua do Campo Alegre, 4169-007 Porto, Portugal

<sup>c</sup>IEETA - Institute of Electronics and Telematics Engineering of Aveiro, University of Aveiro, Santiago Campus, 3810-193 Aveiro, Portugal

\*Corresponding author:

Raquel M. Silva

Present address:

IEETA, University of Aveiro, Santiago Campus, 3810-193 Aveiro, Portugal

Email: raquelsilva@ua.pt

Tel: + 351 234 370 500

Fax: + 351 234 370 545





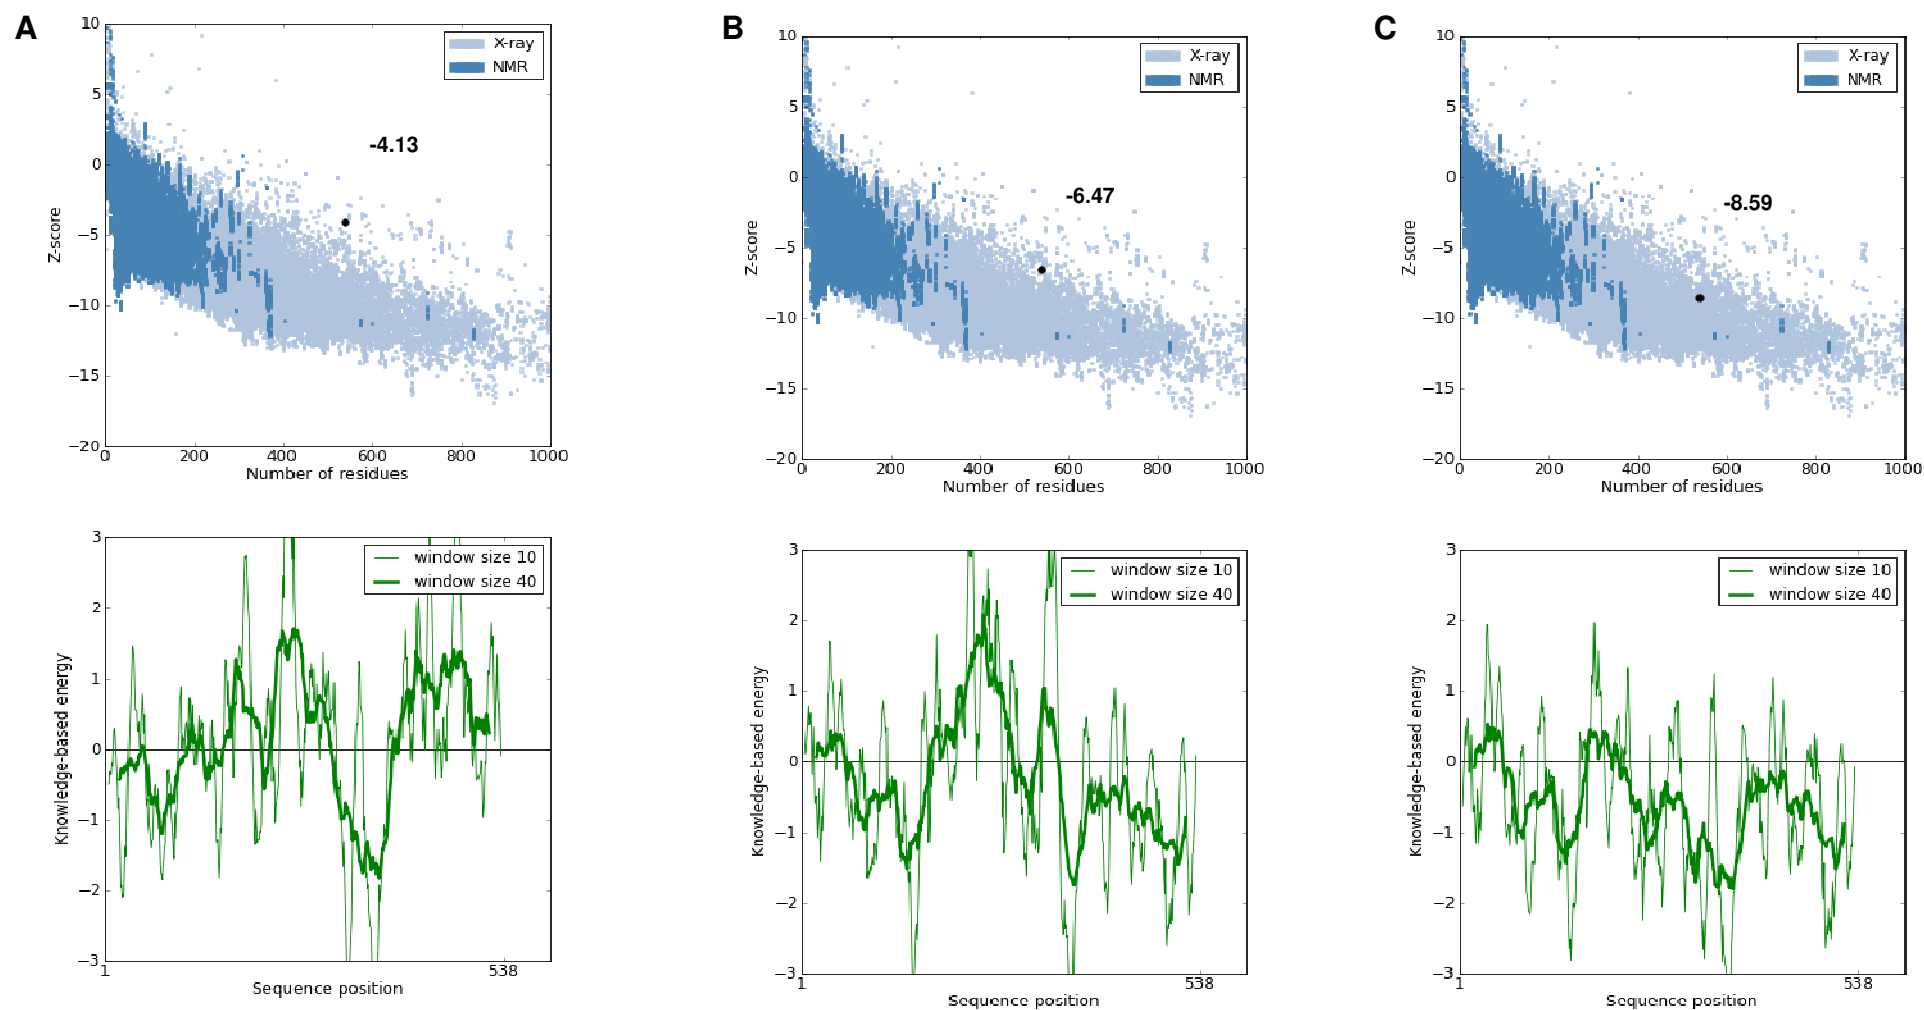

**Supplementary Fig. S3. Quality evaluation of the modeled structures of the human NAPRT1 protein.**

Evaluation of model quality for the predicted 3D structures of human NAPRT1, both overall (top) and locally (bottom) as estimated in ProSA-web. The models were predicted by MODELLER based on the *S. cerevisiae* Npt1 (A), the *E. faecalis* putative NAPRT1 protein (B), or predicted by I-TASSER (C), and the best z-score value was obtained in the latter.

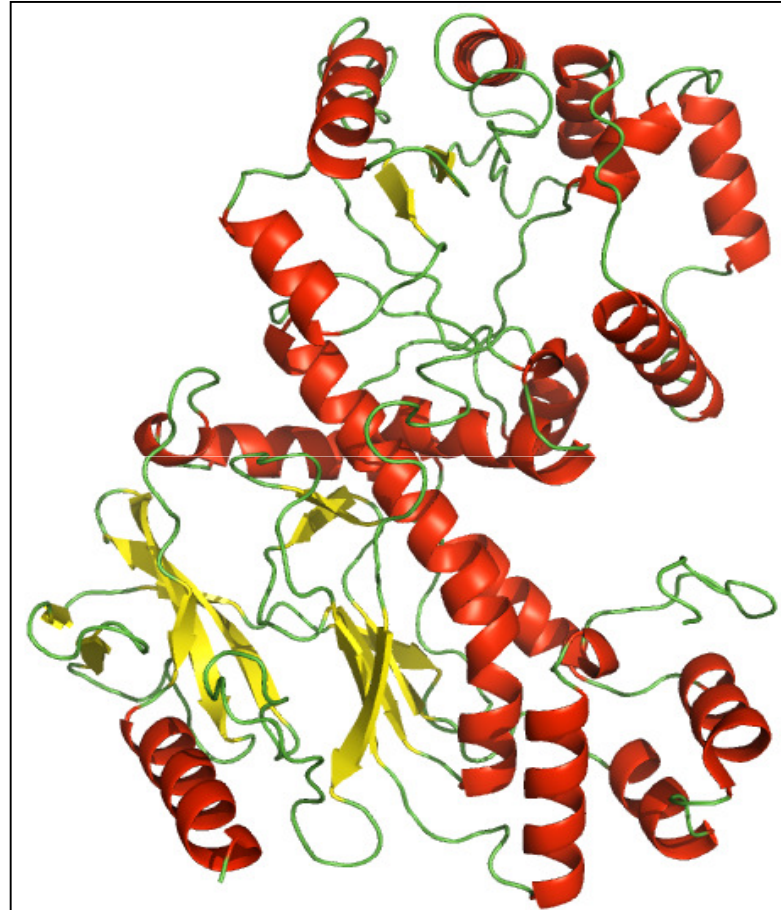

**Supplementary Fig. S4. Predicted tertiary structure of human NAPRT1.**

The model was obtained using the I-TASSER server.  $\alpha$ -Helices are in red,  $\beta$ -sheets are in yellow and loops are in green.

A

# NAMPT

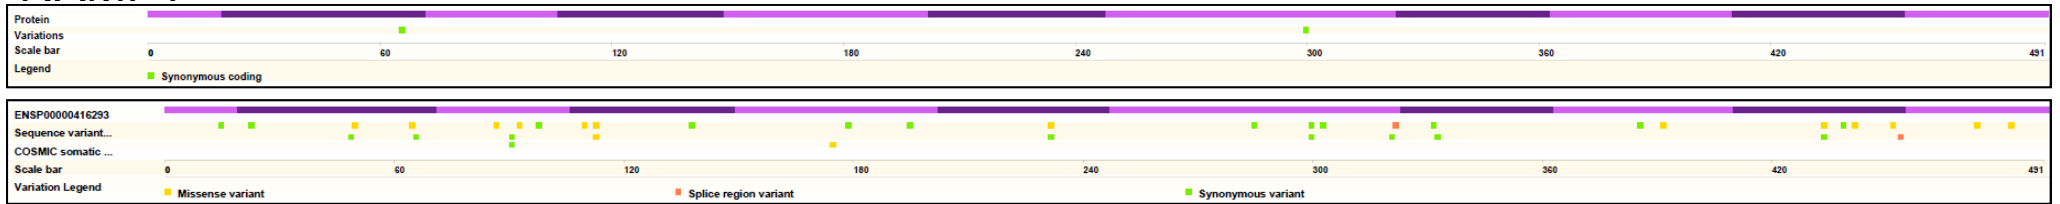

# NAPRT1

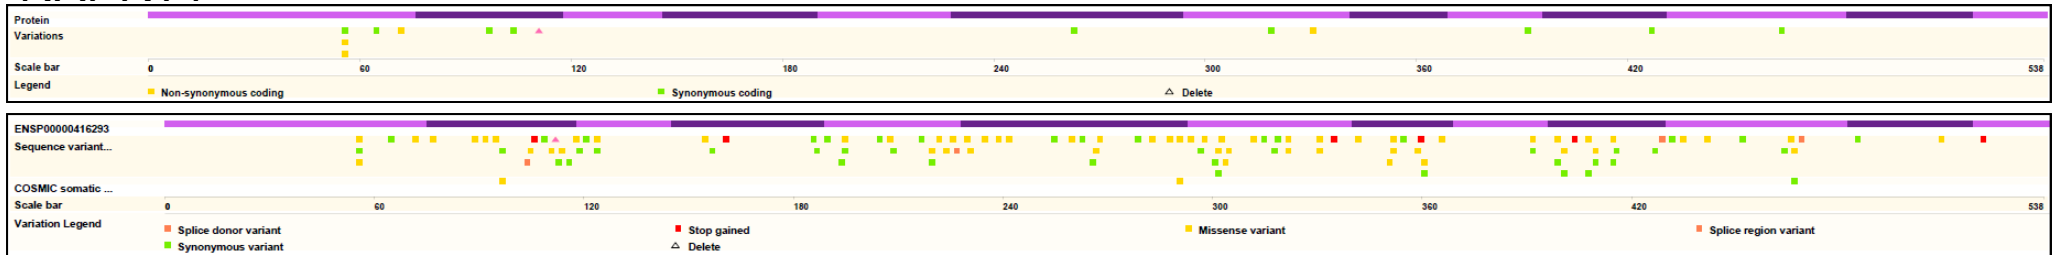

B

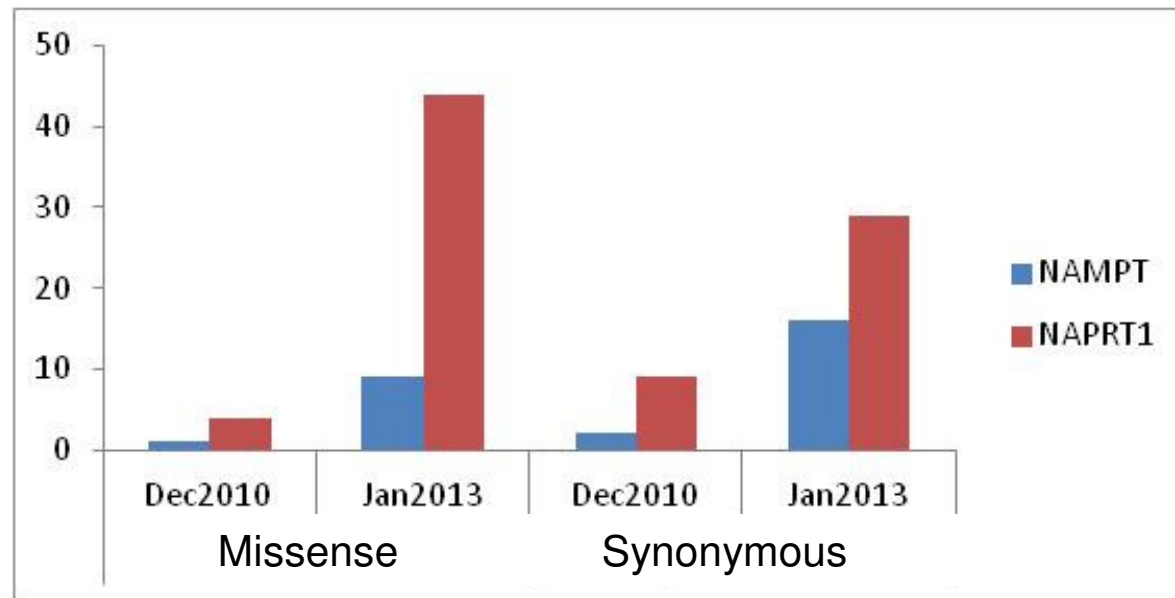

**Supplementary Fig. S5. NAMPT and NAPRT1 variation data retrieved from Ensembl Genome Browser.**  
A. Comparison between 2010 and 2013 shows the increasing number of mutations reported for both genes.  
B. Missense and synonymous variants underline that *NAPRT1* has a higher genetic diversity than *NAMPT*.

## Supplementary Tables

**Supplementary Table S1.** Oligonucleotide sequences used for amplification of NAMPT and NAPRT1 genes.

| Gene   | Location            | Primer forward (5'-3') | Primer reverse (5'-3') | Annealing temperature (°C) | Product size (bp) |
|--------|---------------------|------------------------|------------------------|----------------------------|-------------------|
| NAMPT  | Intron 1 - Intron 2 | CTTCAAGCCTTTTCTGTTGTG  | CTTAGAACATCAAACACACACC | 60                         | 424               |
|        | Intron 3 - Intron 4 | AGCACGTGGCAGCATTAAAC   | GATGAGGAAATTGAAGCCTGG  | 58                         | 502               |
|        | Exon 7 - Intron 7   | CATAACAGCTTGGGGGAAAG   | CTCTCTCTGGGCTGCAACT    | 58                         | 362               |
|        | Intron 8 - Intron 9 | CAGTCTTGGATGCTTCATTC   | CTCCCTTCTTTCCTTGTTTCTG | 58                         | 402               |
| NAPRT1 | Exon 1 - Intron 1   | ACCTCTACCAGGCCACCATG   | GGTAACTGCGCTGAGACCAG   | 64                         | 310               |
|        | Intron 1 - Intron 3 | CTGGTCTCAGCGCAGTTACC   | CAGCCACCTGGCGTAGC      | 60                         | 425               |
|        | Exon 6 - Intron 7   | CTACAGCGTGTGGAGGTGAG   | CACCTGTGCTCACCTTCTGC   | 60                         | 404               |



**Supplementary Table S2.** Sequences of NAMPT and NAPRT1 protein orthologues.

The table lists the species and the associated protein identifier and source used in the protein alignment.

| Species                              | NAMPT        |         |           | NAPRT1         |        |           |
|--------------------------------------|--------------|---------|-----------|----------------|--------|-----------|
|                                      | ID           | source  | size (aa) | ID             | source | size (aa) |
| <i>Homo sapiens</i>                  | NP_005737    | NCBI    | 491       | NP_660202      | NCBI   | 538       |
| <i>Pan troglodytes</i>               | JAA31706     | NCBI    | 491       | JAA00578       | NCBI   | 538       |
| <i>Macaca mulatta</i>                | AFI35917     | NCBI    | 491       | XP_001097478.2 | NCBI   | 481       |
| <i>Mus musculus</i>                  | NP_067499    | NCBI    | 491       | NP_766195      | NCBI   | 538       |
| <i>Rattus norvegicus</i>             | NP_808789    | NCBI    | 491       | NP_997492      | NCBI   | 538       |
| <i>Bos taurus</i>                    | NP_001231070 | NCBI    | 491       | NP_001092327   | NCBI   | 533       |
| <i>Danio rerio</i>                   | CU928083.1   | Ensembl | 493       | NP_957184      | NCBI   | 548       |
| <i>Branchiostoma floridae</i>        | 288618       | JGI     | 475       | 278419         | JGI    | 497       |
| <i>Ciona intestinalis</i>            | -            | -       | -         | 211042         | JGI    | 524       |
| <i>Strongylocentrotus purpuratus</i> | XP_782393    | NCBI    | 480       | XP_787773.3    | NCBI   | 584       |
| <i>Capitella teleta</i>              | 162451       | JGI     | 482       | 175488         | JGI    | 540       |
| <i>Nematostella vectensis</i>        | 135670       | JGI     | 476       | 89511          | JGI    | 547       |
| <i>Saccharomyces cerevisiae</i>      | -            | -       | -         | NP_014852      | NCBI   | 429       |

**Supplementary Table S3.** Bootstrap analyses between allele frequencies of the *NAPRT1* variants obtained in our study versus allele frequencies from the 1000 Genomes Project. The method used for the construction of the bootstrap confidence intervals (95%) was the accelerated bias-correction available in MATLAB (R2011a, MathWorks, Natick, MA, USA).

|             |         | Bootstrap CI |       | 1000Genomes |       | InsideCIBootstrap? |
|-------------|---------|--------------|-------|-------------|-------|--------------------|
|             |         | left         | right |             |       |                    |
| rs2015562   | Control | 0,097        | 0,174 | EUR_AF      | 0,09  | no                 |
|             | Tumor   | 0,294        | 0,444 | ASN_AF      | 0,36  | yes                |
| rs896953    | Control | 0,618        | 0,725 | EUR_AF      | 0,7   | yes                |
|             | Tumor   | 0,625        | 0,763 | ASN_AF      | 0,73  | yes                |
| rs896954    | Control | 0,107        | 0,191 | EUR_AF      | 0,19  | yes                |
|             | Tumor   | 0,075        | 0,181 | ASN_AF      | 0,11  | yes                |
| rs145565666 | Control | 0,000        | 0,017 | EUR_AF      | 0,004 | yes                |
|             | Tumor   | -            | -     | ASN_AF      | n/a   | -                  |
| rs2305496   | Control | 0,091        | 0,168 | EUR_AF      | 0,09  | no                 |
|             | Tumor   | 0,263        | 0,406 | ASN_AF      | 0,38  | yes                |
| rs744650    | Control | 0,003        | 0,030 | EUR_AF      | 0,04  | no                 |
|             | Tumor   | -            | -     | ASN_AF      | n/a   | -                  |
| rs872935    | Control | 0,567        | 0,688 | EUR_AF      | 0,63  | yes                |
|             | Tumor   | 0,200        | 0,331 | ASN_AF      | 0,35  | no                 |
| rs35975875  | Control | 0,000        | 0,023 | EUR_AF      | 0,01  | yes                |
|             | Tumor   | -            | -     | ASN_AF      | n/a   | -                  |
| rs114291348 | Control | 0,013        | 0,063 | EUR_AF      | 0,03  | yes                |
|             | Tumor   | 0,000        | 0,039 | ASN_AF      | n/a   | -                  |

**Supplementary Table S4.** Predicted impact of all dbSNP missense variants for the human *NAMPT* and *NAPRT1* genes, according to SIFT and PolyPhen calculations. Variants were retrieved from Ensembl (release 75 - February 2014), considering the reference transcripts ENST00000222553 and ENST00000449291, respectively.

| Gene          | ID                     | Chr:bp                 | Alleles | Global MAF | AA  | AA coord    | SIFT        |        | PolyPhen          |       |
|---------------|------------------------|------------------------|---------|------------|-----|-------------|-------------|--------|-------------------|-------|
| <i>NAMPT</i>  | rs202025145            | 7:1058915547:105891554 | A/G     | 0.001(G)   | I/T | 484         | tolerated   | 0,42   | benign            | 0     |
|               | rs140819103            | 7:1058915817:105891581 | T/G     | -          | E/A | 475         | tolerated   | 0,15   | benign            | 0,005 |
|               | rs376047293            | 7:1058934707:105893470 | T/C     | -          | Y/C | 453         | tolerated   | 0,17   | benign            | 0,047 |
|               | rs138426703            | 7:1058935007:105893500 | A/G     | -          | L/P | 443         | deleterious | 0,03   | benign            | 0,015 |
|               | rs146170636            | 7:1058935247:105893524 | G/A     | 0.001(A)   | T/M | 435         | tolerated   | 0,1    | possibly damaging | 0,764 |
|               | rs61738828             | 7:1058948617:105894861 | A/C     | -          | D/E | 393         | deleterious | 0      | possibly damaging | 0,874 |
|               | rs148806435            | 7:1059089557:105908955 | G/A     | -          | T/M | 233         | tolerated   | 0,19   | possibly damaging | 0,904 |
|               | rs61746104             | 7:1059130827:105913082 | A/G     | -          | I/T | 114         | deleterious | 0,01   | benign            | 0,108 |
|               | rs142386213            | 7:1059130837:105913083 | T/C     | -          | I/V | 114         | tolerated   | 0,93   | benign            | 0,003 |
|               | rs370987898            | 7:1059130917:105913091 | T/C     | -          | H/R | 111         | tolerated   | 0,42   | benign            | 0     |
|               | rs370874972            | 7:1059154297:105915429 | T/C     | -          | D/G | 94          | tolerated   | 0,22   | benign            | 0,002 |
|               | rs373913615            | 7:1059154477:105915447 | T/C     | -          | K/R | 88          | tolerated   | 0,51   | benign            | 0     |
|               | rs368481844            | 7:1059174877:105917487 | G/C     | -          | L/V | 66          | deleterious | 0,05   | benign            | 0,255 |
| rs139282739   | 7:1059175317:105917531 | T/C                    | -       | K/R        | 51  | tolerated   | 0,06        | benign | 0,104             |       |
| <i>NAPRT1</i> | rs199590650            | 8:1446571828:144657182 | G/A     | -          | R/W | 510         | deleterious | 0      | benign            | 0,035 |
|               | rs368170412            | 8:1446573848:144657384 | G/A     | -          | R/W | 475         | deleterious | 0      | possibly damaging | 0,677 |
|               | rs199833066            | 8:1446573988:144657398 | A/C     | -          | V/G | 470         | deleterious | 0      | probably damaging | 0,955 |
|               | rs149178575            | 8:1446574058:144657405 | C/T     | -          | A/T | 468         | tolerated   | 0,28   | benign            | 0,056 |
|               | rs201086959            | 8:1446574078:144657407 | G/A     | -          | P/L | 467         | deleterious | 0      | probably damaging | 0,988 |
|               | rs141565399            | 8:1446574808:144657480 | C/G     | 0.000 (G)  | E/Q | 443         | deleterious | 0      | probably damaging | 1     |
|               | rs147123886            | 8:1446575008:144657500 | T/A     | -          | D/V | 436         | deleterious | 0      | probably damaging | 1     |
|               | rs147154210            | 8:1446576378:144657637 | G/A/T   | -          | T/M | 416         | deleterious | 0      | possibly damaging | 0,634 |
|               | rs147154210            | 8:1446576378:144657637 | G/A/T   | -          | T/K | 416         | deleterious | 0      | probably damaging | 0,972 |
|               | rs139521261            | 8:1446576538:144657653 | C/T     | 0.001 (T)  | D/N | 411         | deleterious | 0      | probably damaging | 0,936 |
|               | rs144545750            | 8:1446576588:144657658 | G/A     | -          | T/I | 409         | deleterious | 0      | probably damaging | 0,992 |
|               | rs369842187            | 8:1446576798:144657679 | C/T     | -          | G/D | 402         | tolerated   | 0,08   | probably damaging | 0,999 |
|               | rs148462517            | 8:1446576868:144657686 | C/T     | -          | V/M | 400         | deleterious | 0,01   | probably damaging | 0,982 |
| rs369189989   | 8:1446578038:144657803 | C/T                    | -       | G/S        | 393 | deleterious | 0,02        | benign | 0,102             |       |

|             |                        |       |           |     |     |             |      |                   |       |
|-------------|------------------------|-------|-----------|-----|-----|-------------|------|-------------------|-------|
| rs201030598 | 8:1446582568:144658256 | C/T   | 0.002 (T) | A/T | 367 | tolerated   | 0,07 | benign            | 0,07  |
| rs200059887 | 8:1446582708:144658270 | G/A   | 0.001 (A) | A/V | 362 | tolerated   | 0,38 | benign            | 0,009 |
| rs369217099 | 8:1446582778:144658277 | C/T   | -         | E/K | 360 | deleterious | 0    | probably damaging | 0,997 |
| rs373535032 | 8:1446582978:144658297 | A/G   | -         | V/A | 353 | tolerated   | 0,43 | benign            | 0,006 |
| rs144202509 | 8:1446582988:144658298 | C/T   | 0.001 (T) | V/I | 353 | tolerated   | 0,11 | benign            | 0,228 |
| rs373926829 | 8:1446583008:144658300 | A/T   | -         | I/N | 352 | deleterious | 0    | probably damaging | 1     |
| rs377542827 | 8:1446583278:144658327 | T/C   | -         | Q/R | 343 | tolerated   | 0,45 | benign            | 0,046 |
| rs184059139 | 8:1446586298:144658629 | C/T   | 0.001 (T) | R/H | 332 | deleterious | 0,02 | possibly damaging | 0,868 |
| rs35975875  | 8:1446586308:144658630 | G/A   | 0.003 (A) | R/C | 332 | deleterious | 0    | probably damaging | 0,999 |
| rs372036233 | 8:1446586378:144658637 | C/A   | -         | Q/H | 329 | tolerated   | 0,59 | benign            | 0,013 |
| rs201149658 | 8:1446586558:144658655 | G/T   | 0.000 (T) | D/E | 323 | deleterious | 0    | probably damaging | 0,995 |
| rs188697057 | 8:1446586568:144658656 | T/C   | 0.000 (C) | D/G | 323 | deleterious | 0    | probably damaging | 0,996 |
| rs374121375 | 8:1446586878:144658687 | G/A   | -         | R/W | 313 | deleterious | 0    | probably damaging | 0,946 |
| rs145806784 | 8:1446587078:144658707 | G/A   | -         | A/V | 306 | deleterious | 0,04 | probably damaging | 0,923 |
| rs872935    | 8:1446587118:144658711 | G/A/C | 0.449 (A) | L/V | 305 | deleterious | 0,04 | probably damaging | 0,999 |
| rs367982076 | 8:1446587148:144658714 | C/T   | -         | A/T | 304 | tolerated   | 0,06 | probably damaging | 0,939 |
| rs147107119 | 8:1446587168:144658716 | A/G   | -         | V/A | 303 | deleterious | 0    | probably damaging | 0,999 |
| rs370157447 | 8:1446587288:144658728 | T/G   | -         | N/T | 299 | deleterious | 0    | probably damaging | 0,997 |
| rs372583646 | 8:1446587418:144658741 | T/C   | -         | S/G | 295 | deleterious | 0    | probably damaging | 1     |
| rs199622906 | 8:1446588238:144658823 | C/A   | -         | V/L | 292 | deleterious | 0,02 | possibly damaging | 0,519 |
| rs143378632 | 8:1446588318:144658831 | G/A   | -         | T/I | 289 | deleterious | 0    | possibly damaging | 0,799 |
| rs145759182 | 8:1446588468:144658846 | T/C   | -         | Q/R | 284 | deleterious | 0    | benign            | 0,142 |
| rs267601812 | 8:1446588598:144658859 | G/A   | -         | P/S | 280 | deleterious | 0    | probably damaging | 1     |
| rs148205878 | 8:1446588918:144658891 | C/T   | -         | R/Q | 269 | deleterious | 0,01 | benign            | 0,011 |
| rs374205789 | 8:1446588958:144658895 | C/T   | -         | E/K | 268 | deleterious | 0    | probably damaging | 0,988 |
| rs199672137 | 8:1446589168:144658916 | C/A   | 0.000 (A) | V/L | 261 | tolerated   | 0,65 | benign            | 0,001 |
| rs373667786 | 8:1446589198:144658919 | C/G   | -         | G/R | 260 | tolerated   | 0,58 | benign            | 0,005 |
| rs199843319 | 8:1446589698:144658969 | G/A   | -         | A/V | 243 | tolerated   | 1    | benign            | 0,004 |
| rs150754257 | 8:1446589798:144658979 | C/T   | -         | V/M | 240 | tolerated   | 0,27 | benign            | 0,094 |
| rs139128977 | 8:1446589918:144658991 | C/T   | -         | E/K | 236 | tolerated   | 0,89 | benign            | 0,001 |
| rs368314681 | 8:1446590028:144659002 | G/A   | -         | P/L | 232 | tolerated   | 0,24 | benign            | 0,272 |
| rs201161077 | 8:1446590058:144659005 | G/A   | -         | A/V | 231 | tolerated   | 0,32 | benign            | 0,017 |
| rs200176063 | 8:1446592378:144659237 | C/T   | 0.002 (T) | D/N | 227 | tolerated   | 0,33 | benign            | 0,003 |

|             |                           |       |           |     |     |             |      |                   |       |
|-------------|---------------------------|-------|-----------|-----|-----|-------------|------|-------------------|-------|
| rs146015422 | 8:1446592428:144659242    | G/A   | -         | P/L | 225 | tolerated   | 0,52 | benign            | 0,043 |
| rs373219862 | 8:1446592498:144659249    | C/T   | -         | E/K | 223 | tolerated   | 0,11 | possibly damaging | 0,821 |
| rs139975718 | 8:1446592548:144659254    | C/T   | -         | G/D | 221 | tolerated   | 0,13 | probably damaging | 0,955 |
| rs144223221 | 8:1446592918:144659291    | C/T   | -         | G/R | 209 | deleterious | 0    | probably damaging | 0,999 |
| rs142312560 | 8:1446593308:144659330    | T/G   | -         | N/H | 196 | deleterious | 0    | probably damaging | 1     |
| rs111826960 | 8:1446595418:144659541    | G/A   | -         | R/C | 156 | deleterious | 0    | probably damaging | 0,991 |
| rs376323296 | 8:1446598918:144659891    | A/C   | -         | S/A | 125 | tolerated   | 0,1  | benign            | 0,009 |
| rs111763816 | 8:1446599088:144659908    | A/G   | -         | V/A | 119 | deleterious | 0,01 | probably damaging | 0,998 |
| rs369745388 | 8:1446599978:144659997    | C/T   | -         | A/T | 115 | deleterious | 0,01 | possibly damaging | 0,713 |
| rs373884377 | 8:1446600068:144660006    | C/T   | -         | G/S | 112 | deleterious | 0    | probably damaging | 1     |
| rs200364051 | 8:1446600248:144660024    | C/T   | -         | V/M | 106 | tolerated   | 0,16 | benign            | 0,153 |
| rs186257137 | 8:1446600548:144660054    | G/A   | 0.000 (A) | L/F | 96  | deleterious | 0    | probably damaging | 0,973 |
| rs201407810 | 8:1446600638:144660063    | A/G   | 0.000 (G) | F/L | 93  | tolerated   | 0,06 | benign            | 0,053 |
| rs376515994 | 8:1446600728:144660072    | G/T   | -         | P/T | 90  | tolerated   | 0,23 | possibly damaging | 0,811 |
| rs200997239 | 8:1446601068:144660106    | C/G   | 0.001 (G) | Q/H | 78  | deleterious | 0,05 | possibly damaging | 0,62  |
| rs11990768  | 8:1446602718:144660271    | C/T   | -         | R/Q | 73  | tolerated   | 0,07 | benign            | 0,002 |
| rs35914195  | 8:1446603188:144660318-14 | GG/TA | -         | A/V | 57  | deleterious | 0,01 | benign            | 0,08  |
| rs896950    | 8:1446603198:144660319    | G/A   | 0.014 (A) | A/V | 57  | deleterious | 0,01 | benign            | 0,08  |

**Supplementary Table S5.** Predicted impact of the *NAMPT* and *NAPRT1* variants found in our study. Variants were retrieved from 1000 Genomes Browser and scored according to the CADD server (<http://cadd.gs.washington.edu/score>).

| Gene          | ID          | Chr | Position  | Variant type |           | Cscore | Splice annotation |
|---------------|-------------|-----|-----------|--------------|-----------|--------|-------------------|
| <i>NAMPT</i>  | rs41430346  | 7   | 105913155 | Non-coding   | -         | 2,069  | NA                |
|               | rs375379216 | 7   | 105913141 | Non-coding   | -         | -      | -                 |
|               | rs112487390 | 7   | 105912865 | Non-coding   | -         | 11,33  | NA                |
|               | rs2302559   | 7   | 105903904 | Silent       | Ser301Ser | 7,273  | NA                |
|               | rs144888107 | 7   | 105903789 | Non-coding   | -         | 4,783  | NA                |
| <i>NAPRT1</i> | rs2015562   | 8   | 144660257 | Non-coding   | -         | 1,111  | DONOR             |
|               | rs896953    | 8   | 144660189 | Non-coding   | -         | 0,123  | NA                |
|               | rs896954    | 8   | 144660046 | Silent       | Ala98Ala  | 11,6   | NA                |
|               | rs200364051 | 8   | 144660024 | Missense     | Val106Met | -      | -                 |
|               | rs145565666 | 8   | 144659998 | Silent       | Leu114Leu | 13,01  | DONOR             |
|               | rs2305496   | 8   | 144659949 | Non-coding   | -         | 4,955  | NA                |
|               | -           | 8   | 144659838 | Silent       | Val142Val | -      | -                 |
|               | rs12678314  | 8   | 144659608 | Non-coding   | -         | 5,774  | NA                |
|               | rs744650    | 8   | 144658730 | Silent       | Pro298Pro | 3,054  | ACCEPTOR          |
|               | rs872935    | 8   | 144658711 | Silent       | Leu305Leu | 1,158  | NA                |
|               | rs35975875  | 8   | 144658630 | Missense     | Arg332Cys | 20,9   | NA                |
|               | rs114291348 | 8   | 144658505 | Non-coding   | -         | 3,723  | NA                |
|               | -           | 8   | 144658501 | Non-coding   | -         | -      | -                 |
|               | rs896955    | 8   | 144658370 | Non-coding   | -         | 6,296  | NA                |
|               | -           | 8   | 144657972 | Non-coding   | -         | -      | -                 |
|               | rs2290417   | 8   | 144657269 | Non-coding   | -         | 14,31  | ACCEPTOR          |
|               | rs77951814  | 8   | 144657152 | Non-coding   | -         | 16,73  | DONOR             |
